# Supplementary material for: Cryptic Diversity in Metropolis: Confirmation of a New Leopard Frog Species (Anura: Ranidae) from New York City and Surrounding Atlantic Coast Regions
Source: PLoS One. 2014 Oct 29;9(10):e108213. doi: 10.1371/journal.pone.0108213 (PMC4212910; doi:10.1371/journal.pone.0108213)
Supplement: Table S9 — Underlying (raw) data for color and pattern analyses. (XLSX) [file pone.0108213.s013.xlsx]

## Sheet: Sheet1
Table S9. Underlying (raw) data for color and pattern analyses.
Includes dorsal spot (count, coverage, and shape), snout spot, and femur reticulum analyses. These data were used in Figure S3 and Results (text). Additional information for each specimen is presented in Table S1. Examination-only specimens (not used in analyzes) are not included here.
Record Number	Museum	Specimen Number	Taxon	State/Province	County/Region	ID Notes	Color (n=169)	Dorsal Spot # (n=40)	Dorsal Spots % (n=40)	Reticulum State (n=108)	Spot Shape (dorsal spots) (n=109)	Snout Spot (n=147)
1	AMNH	84220	R. kauffeldi	NJ	Bergen					Dark
2	AMNH	121324	R. kauffeldi	NJ	Bergen					Dark
3	AMNH	121340	R. kauffeldi	NJ	Bergen					Dark
4	AMNH	121341	R. kauffeldi	NJ	Bergen					Dark
5	AMNH	121857	R. kauffeldi	NY	Richmond					Dark
6	AMNH	121858	R. kauffeldi	NY	Richmond					Dark
7	Porter (1941)	Figure 1	R. kauffeldi	PA	Philadelphia	Right photo		14	16.874			No
8	YPM	13217	R. kauffeldi	NY	Richmond		DarkOlive-MintGray	16	14.7223	Dark	Elongate	No
9	YPM	13767	R. kauffeldi	NY	Richmond					Dark
10	YPM	13768	R. kauffeldi	NY	Richmond	Amplexed female	DarkOlive-MintGray					No
11	YPM	13768	R. kauffeldi	NY	Richmond	Amplexed male	DarkOlive-MintGray					No
12	YPM	13788	R. kauffeldi	NY	Richmond		DarkOlive-MintGray	13	12.0051	Dark	Round	Yes
13	YPM	13789	R. kauffeldi	NY	Richmond		Green-LightBrown	13	12.3552	Dark	Round	Yes
14	YPM	13790	R. kauffeldi	NY	Richmond		Green-LightBrown				Elongate	Yes
15	YPM	13791	R. kauffeldi	NY	Richmond		DarkOlive-MintGray
16	YPM	13792	R. kauffeldi	NY	Richmond		DarkOlive-MintGray					Yes
17	YPM	13793	R. kauffeldi	NY	Richmond	Bottom frog	DarkOlive-MintGray					Yes
18	YPM	13820	R. kauffeldi	NY	Richmond		Green-LightBrown	8	5.62848		Round	No
19	YPM	13821	R. kauffeldi	NY	Richmond		Green-LightBrown	10	9.36043		Round	No
20	YPM	13822	R. kauffeldi	NY	Richmond		DarkOlive-MintGray
21	YPM	13823	R. kauffeldi	NY	Richmond		DarkOlive-MintGray
22	YPM	13824	R. kauffeldi	NY	Richmond		DarkOlive-MintGray					No
23	YPM	13825	R. kauffeldi	NY	Richmond		DarkOlive-MintGray					No
24	YPM	13826	R. kauffeldi	NY	Richmond		DarkOlive-MintGray					No
25	YPM	13827	R. kauffeldi	NY	Richmond		DarkOlive-MintGray				Round	No
26	YPM	13828	R. kauffeldi	NY	Richmond		DarkOlive-MintGray
27	YPM	13829	R. kauffeldi	NY	Richmond		DarkOlive-MintGray					No
28	YPM	13830	R. kauffeldi	NY	Richmond		DarkOlive-MintGray					No
29	YPM	13831	R. kauffeldi	NY	Richmond		DarkOlive-MintGray					No
30	YPM	13832	R. kauffeldi	NY	Richmond		DarkOlive-MintGray
31	YPM	13833	R. kauffeldi	NY	Richmond		DarkOlive-MintGray
32	YPM	13834	R. kauffeldi	NY	Richmond		DarkOlive-MintGray					No
33	YPM	13835	R. kauffeldi	NY	Richmond		DarkOlive-MintGray					No
34	YPM	13836	R. kauffeldi	NY	Richmond		Green-LightBrown				Round	No
35	YPM	13837	R. kauffeldi	NY	Richmond		DarkOlive-MintGray
36	YPM	13838	R. kauffeldi	NY	Richmond		DarkOlive-MintGray				Elongate	No
37	YPM	13840	R. kauffeldi	NY	Richmond		DarkOlive-MintGray				Elongate	No
38	YPM	13841	R. kauffeldi	NY	Richmond		DarkOlive-MintGray					No
39	YPM	13842	R. kauffeldi	NY	Richmond		DarkOlive-MintGray				Round	No
40	YPM	13843	R. kauffeldi	NY	Richmond		DarkOlive-MintGray
41	YPM	13844	R. kauffeldi	NY	Richmond		DarkOlive-MintGray
42	YPM	13845	R. kauffeldi	NY	Richmond		DarkOlive-MintGray
43	YPM	13847	R. kauffeldi	NY	Richmond		DarkOlive-MintGray	10	13.6468	Dark	Round	No
44	YPM	13848	R. kauffeldi	NY	Richmond		DarkOlive-MintGray				Elongate	No
45	YPM	13849	R. kauffeldi	NY	Richmond		DarkOlive-MintGray				Round	No
46	YPM	13850	R. kauffeldi	NY	Richmond			17	20.7015	Dark	Elongate	Yes
47	YPM	13851	R. kauffeldi	NY	Richmond	Top frog	DarkOlive-MintGray	15	8.65769	Dark	Round	Yes
48	YPM	13853	R. kauffeldi	NY	Richmond		DarkOlive-MintGray	12	11.9145	Dark	Elongate	No
49	YPM	13854	R. kauffeldi	NY	Richmond		DarkOlive-MintGray	17	12.2501	Dark	Round	Yes
50	YPM	13862	R. kauffeldi	NY	Richmond		Green-LightBrown			Dark	Round	No
51	YPM	13863	R. kauffeldi	NY	Richmond		Green-LightBrown			Dark	Round	No
52	YPM	13864	R. kauffeldi	NY	Richmond	Amplexed male	DarkOlive-MintGray				Round	No
53	YPM	13864	R. kauffeldi	NY	Richmond	Amplexed female	DarkOlive-MintGray					No
54	YPM	13865	R. kauffeldi	NY	Richmond		Green-LightBrown			Dark	Round	Yes
55	YPM	13866	R. kauffeldi	NY	Richmond		DarkOlive-MintGray	12	12.8243			Yes
56	YPM	13867	R. kauffeldi	NY	Richmond		DarkOlive-MintGray					No
57	YPM	13868	R. kauffeldi	NY	Richmond		DarkOlive-MintGray					No
58	YPM	13869	R. kauffeldi	NY	Richmond		Green-LightBrown					No
59	YPM	13870	R. kauffeldi	NY	Richmond		DarkOlive-MintGray					Yes
60	YPM	13871	R. kauffeldi	NY	Richmond		DarkOlive-MintGray					Yes
61	YPM	13872	R. kauffeldi	NY	Richmond		DarkOlive-MintGray				Round	No
62	YPM	13920	R. kauffeldi	NY	Richmond		DarkOlive-MintGray			Dark	Elongate	Yes
63	YPM	13921	R. kauffeldi	NY	Richmond		DarkOlive-MintGray			Dark	Round	No
64	YPM	14017	R. kauffeldi	NY	Richmond		Green-LightBrown					Yes
65	YPM	14018	R. kauffeldi	NY	Richmond		DarkOlive-MintGray
66	YPM	14019	R. kauffeldi	NY	Richmond		Green-LightBrown				Round	Yes
67	YPM	14020	R. kauffeldi	NY	Richmond		DarkOlive-MintGray	20	16.1465	Dark	Round	Yes
68	YPM	14021	R. kauffeldi	NY	Richmond		DarkOlive-MintGray	15	15.3493	Dark	Round	Yes
69	YPM	14022	R. kauffeldi	NY	Richmond		Green-LightBrown	17	11.1509		Elongate	No
70	YPM	14023	R. kauffeldi	NY	Richmond		Green-LightBrown				Round	No
71	YPM	14024	R. kauffeldi	NY	Richmond		DarkOlive-MintGray			Dark	Elongate	No
72	YPM	14025	R. kauffeldi	NY	Richmond		Green-LightBrown			Dark	Elongate	Yes
73	YPM	14026	R. kauffeldi	NY	Richmond		Green-LightBrown				Elongate	No
74	YPM	14027	R. kauffeldi	NY	Richmond		Green-LightBrown	11	18.2723		Round	No
75	YPM	14028	R. kauffeldi	NY	Richmond		Green-LightBrown				Round	No
76	YPM	14029	R. kauffeldi	NY	Richmond		BrightGreen	15	13.8382		Round	Yes
77	YPM	14032	R. kauffeldi	NY	Richmond		DarkOlive-MintGray					No
78	YPM	14033	R. kauffeldi	NY	Richmond		DarkOlive-MintGray					Yes
79	YPM	14048	R. kauffeldi	NY	Richmond		DarkOlive-MintGray				Round	No
80	YPM	14086	R. kauffeldi	NY	Richmond		DarkOlive-MintGray				Elongate	Yes
81	YPM	14107	R. kauffeldi	NY	Richmond		DarkOlive-MintGray	8	15.316	Dark	Elongate	No
82	YPM	14108	R. kauffeldi	NY	Richmond		DarkOlive-MintGray	9	14.9448		Round	No
83	YPM	14110	R. kauffeldi	NY	Richmond		Green-LightBrown				Round	Yes
84	YPM	14111	R. kauffeldi	NY	Richmond		DarkOlive-MintGray			Dark		Yes
85	YPM	14112	R. kauffeldi	NY	Richmond					Dark	Elongate	No
86	AMNH	23030	R. kauffeldi.	NY	Richmond	see also Moore (1944) Pl. 62, #4		15	15.4038			No
87	AMNH	35503	R. kauffeldi.	NJ	Bergen	see also Moore (1944) Pl. 62, #5		11	12.1235			No
88	AMNH	35512	R. kauffeldi.	NJ	Bergen	see also Moore (1944) Pl. 62, #6		12	14.8712			No
89	YPM	1022	R. pipiens	CT	New Haven					Light
90	YPM	1045	R. pipiens	Quebec	Gaspe Peninsula					Light
91	YPM	1048	R. pipiens	Quebec	Gaspe Peninsula					Light
92	YPM	1077	R. pipiens	CT	New Haven					Light
93	YPM	1143	R. pipiens	CT	New Haven					Light
94	YPM	2906	R. pipiens	CT	New Haven					Light
95	YPM	2907	R. pipiens	CT	New Haven					Light
96	YPM	2908	R. pipiens	CT	New Haven					Light
97	YPM	2909	R. pipiens	CT	New Haven					Light
98	YPM	2965	R. pipiens	Quebec	Gaspe Peninsula					Light
99	YPM	2966	R. pipiens	Quebec	Gaspe Peninsula					Light
100	YPM	2967	R. pipiens	Quebec	Gaspe Peninsula					Light
101	YPM	2968	R. pipiens	Quebec	Gaspe Peninsula					Light
102	YPM	2969	R. pipiens	Quebec	Gaspe Peninsula					Light
103	YPM	2970	R. pipiens	Quebec	Gaspe Peninsula					Light
104	YPM	2971	R. pipiens	Quebec	Gaspe Peninsula					Light
105	YPM	2972	R. pipiens	Quebec	Gaspe Peninsula					Light
106	YPM	2973	R. pipiens	Quebec	Gaspe Peninsula					Light
107	YPM	2976	R. pipiens	Quebec	Gaspe Peninsula					Light
108	YPM	2977	R. pipiens	Quebec	Gaspe Peninsula					Light
109	YPM	2978	R. pipiens	Quebec	Gaspe Peninsula					Light
110	YPM	2979	R. pipiens	Quebec	Gaspe Peninsula					Light
111	YPM	3068	R. pipiens	CT	New Haven					Light
112	YPM	3069	R. pipiens	CT	New Haven					Light
113	YPM	5808	R. pipiens	RI	Aquidneck Island					Light
114	YPM	5809	R. pipiens	RI	Aquidneck Island					Light
115	YPM	5810	R. pipiens	RI	Aquidneck Island					Light
116	YPM	9315	R. pipiens	CT	Litchfield					Light
117	YPM	13052	R. pipiens	CT	Litchfield					Light
118	YPM	13562	R. pipiens	CT	Middlesex					Light
119	YPM	13564	R. pipiens	CT	Litchfield					Light
120	YPM	13565	R. pipiens	CT	Litchfield					Light
121	YPM	13566	R. pipiens	CT	Litchfield					Light
122	YPM	13567	R. pipiens	CT	Litchfield					Light
123	YPM	13568	R. pipiens	CT	Litchfield					Light
124	YPM	13569	R. pipiens	CT	Litchfield					Light
125	YPM	13570	R. pipiens	CT	Litchfield					Light
126	YPM	13571	R. pipiens	CT	Litchfield					Light
127	YPM	13572	R. pipiens	CT	Litchfield					Light
128	YPM	13573	R. pipiens	CT	Litchfield					Light
129	YPM	13574	R. pipiens	CT	Litchfield					Light
130	YPM	13575	R. pipiens	CT	Litchfield					Light
131	YPM	13576	R. pipiens	CT	Litchfield					Light
132	YPM	13577	R. pipiens	CT	Litchfield					Light
133	YPM	13578	R. pipiens	CT	Litchfield					Light
134	YPM	13612	R. pipiens	CT	Litchfield					Light
135	AMNH	116842	R. sphenocephala	NJ	Middlesex					Light
136	AMNH	121144	R. sphenocephala	NJ	Burlington					Light
137	AMNH	121145	R. sphenocephala	NJ	Burlington					Light
138	AMNH	121148	R. sphenocephala	NJ	Burlington					Light
139	AMNH	121149	R. sphenocephala	NJ	Burlington					Dark
140	AMNH	121151	R. sphenocephala	NJ	Burlington					Light
141	AMNH	121153	R. sphenocephala	NJ	Burlington					Light
142	AMNH	121154	R. sphenocephala	NJ	Burlington					Light
143	AMNH	121155	R. sphenocephala	NJ	Burlington					Light
144	AMNH	121156	R. sphenocephala	NJ	Burlington					Light
145	YPM	13769	R. sphenocephala	NJ	Burlington		DarkOlive-MintGray			Dark	Round	No
146	YPM	13770	R. sphenocephala	NJ	Burlington						Elongate	No
147	YPM	13771	R. sphenocephala	NJ	Burlington		DarkOlive-MintGray	17	19.8995		Round	No
148	YPM	13772	R. sphenocephala	NJ	Burlington		DarkOlive-MintGray				Round	No
149	YPM	13794	R. sphenocephala	NJ	Burlington		BrightGreen	14	27.7965		Elongate	No
150	YPM	13795	R. sphenocephala	NJ	Burlington		DarkOlive-MintGray				Elongate	No
151	YPM	13796	R. sphenocephala	NJ	Burlington		Green-LightBrown			Light	Elongate	No
152	YPM	13797	R. sphenocephala	NJ	Burlington		Green-LightBrown				Elongate	No
153	YPM	13798	R. sphenocephala	NJ	Ocean		DarkOlive-MintGray			Dark	Elongate	No
154	YPM	13799	R. sphenocephala	NJ	Burlington		DarkOlive-MintGray
155	YPM	13800	R. sphenocephala	NJ	Burlington		Green-LightBrown				Elongate	No
156	YPM	13801	R. sphenocephala	NJ	Ocean		DarkOlive-MintGray	23	48.6958	Light	Elongate	Yes
157	YPM	13802	R. sphenocephala	NJ	Burlington		Green-LightBrown					No
158	YPM	13803	R. sphenocephala	NC	Dare		DarkOlive-MintGray					No
159	YPM	13804	R. sphenocephala	NC	Dare		Green-LightBrown					No
160	YPM	13805	R. sphenocephala	NC	Dare		BrightGreen
161	YPM	13856	R. sphenocephala	NJ	Burlington		DarkOlive-MintGray
162	YPM	13857	R. sphenocephala	NJ	Burlington		DarkOlive-MintGray				Round	No
163	YPM	13858	R. sphenocephala	NJ	Burlington		DarkOlive-MintGray					No
164	YPM	13859	R. sphenocephala	NJ	Burlington		Green-LightBrown				Round	Yes
165	YPM	13860	R. sphenocephala	NJ	Burlington		DarkOlive-MintGray				Elongate	Yes
166	YPM	13861	R. sphenocephala	NJ	Burlington		DarkOlive-MintGray				Elongate	Yes
167	YPM	14030	R. sphenocephala	NJ	Middlesex		BrightGreen			Light	Round	No
168	YPM	14031	R. sphenocephala	NJ	Middlesex		BrightGreen					No
169	YPM	14034	R. sphenocephala	NJ	Burlington		Green-LightBrown			Light	Round	No
170	YPM	14035	R. sphenocephala	NJ	Burlington		Green-LightBrown	19	17.0487	Light	Round	No
171	YPM	14036	R. sphenocephala	NJ	Burlington		DarkOlive-MintGray			Light	Round	No
172	YPM	14037	R. sphenocephala	NJ	Burlington		Green-LightBrown			Light	Elongate	No
173	YPM	14038	R. sphenocephala	NJ	Burlington		Green-LightBrown			Light	Round	No
174	YPM	14039	R. sphenocephala	NJ	Burlington		BrightGreen	19	12.8556	Light	Round	No
175	YPM	14040	R. sphenocephala	NJ	Burlington		DarkOlive-MintGray			Light	Elongate	No
176	YPM	14041	R. sphenocephala	NJ	Burlington		Green-LightBrown			Dark	Round	No
177	YPM	14042	R. sphenocephala	NJ	Burlington		DarkOlive-MintGray			Light	Elongate	No
178	YPM	14043	R. sphenocephala	NJ	Burlington		DarkOlive-MintGray			Light	Round	No
179	YPM	14044	R. sphenocephala	NJ	Burlington		Green-LightBrown			Light	Elongate	No
180	YPM	14045	R. sphenocephala	NJ	Burlington		BrightGreen			Light	Round	No
181	YPM	14046	R. sphenocephala	NJ	Burlington		DarkOlive-MintGray			Light	Round	No
182	YPM	14047	R. sphenocephala	NJ	Burlington		DarkOlive-MintGray			Light	Elongate	Yes
183	YPM	14049	R. sphenocephala	NJ	Burlington		BrightGreen					No
184	YPM	14050	R. sphenocephala	NJ	Ocean		Green-LightBrown				Round	No
185	YPM	14051	R. sphenocephala	NJ	Ocean		DarkOlive-MintGray			Light
186	YPM	14052	R. sphenocephala	NJ	Ocean		Green-LightBrown				Elongate	No
187	YPM	14053	R. sphenocephala	NJ	Burlington		DarkOlive-MintGray				Elongate	No
188	YPM	14054	R. sphenocephala	NJ	Burlington		Green-LightBrown				Round	No
189	YPM	14055	R. sphenocephala	NJ	Burlington		Green-LightBrown				Elongate	No
190	YPM	14056	R. sphenocephala	NJ	Burlington		DarkOlive-MintGray				Elongate	No
191	YPM	14057	R. sphenocephala	NJ	Burlington		BrightGreen					No
192	YPM	14058	R. sphenocephala	NJ	Burlington		Green-LightBrown	22	21.091		Round	Yes
193	YPM	14059	R. sphenocephala	NJ	Burlington		Green-LightBrown	26	16.1241		Elongate	No
194	YPM	14060	R. sphenocephala	NJ	Burlington		DarkOlive-MintGray				Round	No
195	YPM	14061	R. sphenocephala	NJ	Burlington		Green-LightBrown
196	YPM	14062	R. sphenocephala	NJ	Burlington		DarkOlive-MintGray					No
197	YPM	14063	R. sphenocephala	NJ	Burlington		DarkOlive-MintGray				Round
198	YPM	14064	R. sphenocephala	NJ	Burlington		DarkOlive-MintGray	20	20.7539		Elongate	No
199	YPM	14065	R. sphenocephala	NJ	Burlington		Green-LightBrown				Elongate
200	YPM	14066	R. sphenocephala	NJ	Burlington		BrightGreen				Round	No
201	YPM	14067	R. sphenocephala	NJ	Burlington		Green-LightBrown				Elongate	No
202	YPM	14068	R. sphenocephala	NJ	Burlington		DarkOlive-MintGray				Round
203	YPM	14069	R. sphenocephala	NJ	Burlington		DarkOlive-MintGray	17	27.6655		Elongate	No
204	YPM	14070	R. sphenocephala	NJ	Burlington		DarkOlive-MintGray	19	19.7975		Elongate	No
205	YPM	14071	R. sphenocephala	NJ	Burlington		DarkOlive-MintGray				Elongate	No
206	YPM	14072	R. sphenocephala	NJ	Burlington		DarkOlive-MintGray	20	19.09	Light	Elongate
207	YPM	14073	R. sphenocephala	NJ	Burlington		BrightGreen				Elongate
208	YPM	14074	R. sphenocephala	NJ	Burlington		Green-LightBrown					No
209	YPM	14075	R. sphenocephala	NJ	Burlington		DarkOlive-MintGray					No
210	YPM	14076	R. sphenocephala	NJ	Burlington		DarkOlive-MintGray
211	YPM	14077	R. sphenocephala	NJ	Burlington		DarkOlive-MintGray				Round
212	YPM	14078	R. sphenocephala	NJ	Burlington		Green-LightBrown					No
213	YPM	14079	R. sphenocephala	NJ	Burlington		BrightGreen				Elongate
214	YPM	14080	R. sphenocephala	NJ	Burlington		Green-LightBrown
215	YPM	14081	R. sphenocephala	NJ	Burlington		DarkOlive-MintGray				Round	Yes
216	YPM	14082	R. sphenocephala	NJ	Burlington		Green-LightBrown
217	YPM	14083	R. sphenocephala	NJ	Burlington		DarkOlive-MintGray
218	YPM	14084	R. sphenocephala	NJ	Burlington		Green-LightBrown	25	21.652		Elongate	Yes
219	YPM	14085	R. sphenocephala	NJ	Burlington		DarkOlive-MintGray	15	15.5132	Light	Elongate
220	YPM	14087	R. sphenocephala	NJ	Burlington		Green-LightBrown					No
221	YPM	14088	R. sphenocephala	NJ	Burlington		DarkOlive-MintGray			Light	Elongate	No
222	YPM	14089	R. sphenocephala	NJ	Burlington		Green-LightBrown	23	18.4449		Elongate	Yes
223	YPM	14090	R. sphenocephala	NJ	Burlington		DarkOlive-MintGray				Elongate	No
224	YPM	14091	R. sphenocephala	NJ	Burlington		DarkOlive-MintGray					No
225	YPM	14092	R. sphenocephala	NJ	Burlington		Green-LightBrown				Elongate	No
226	YPM	14093	R. sphenocephala	NJ	Burlington		Green-LightBrown				Elongate	No
227	YPM	14094	R. sphenocephala	NJ	Burlington		Green-LightBrown					No
228	YPM	14095	R. sphenocephala	NJ	Burlington		Green-LightBrown					No
229	YPM	14096	R. sphenocephala	NJ	Burlington		DarkOlive-MintGray	20	21.6148		Elongate	No
230	YPM	14097	R. sphenocephala	NJ	Burlington		Green-LightBrown	20	26.8902	Light	Elongate	No
231	YPM	14098	R. sphenocephala	NJ	Burlington		DarkOlive-MintGray					No
232	YPM	14099	R. sphenocephala	NJ	Burlington		DarkOlive-MintGray					Yes
233	YPM	14100	R. sphenocephala	NJ	Burlington		Green-LightBrown				Round	No
234	YPM	14101	R. sphenocephala	NJ	Burlington		DarkOlive-MintGray					Yes
235	YPM	14102	R. sphenocephala	NJ	Burlington		BrightGreen	18	23.0662		Elongate	Yes
236	YPM	14103	R. sphenocephala	NJ	Burlington		Green-LightBrown	31	20.3135		Elongate	Yes
237	YPM	14104	R. sphenocephala	NJ	Burlington		BrightGreen					No
238	YPM	14105	R. sphenocephala	NJ	Burlington		BrightGreen			Light	Elongate	No
239	YPM	14106	R. sphenocephala	NJ	Burlington		Green-LightBrown				Round
